# Supplementary material for: Suction Versus Nonsuction Drainage After Uniportal Video-Assisted Thoracoscopic Surgery: A Propensity Score-Matched Study
Source: PubMed Central journal article supplement (PMC8577848; doi:10.3389/fonc.2021.751396), 2021-10-26

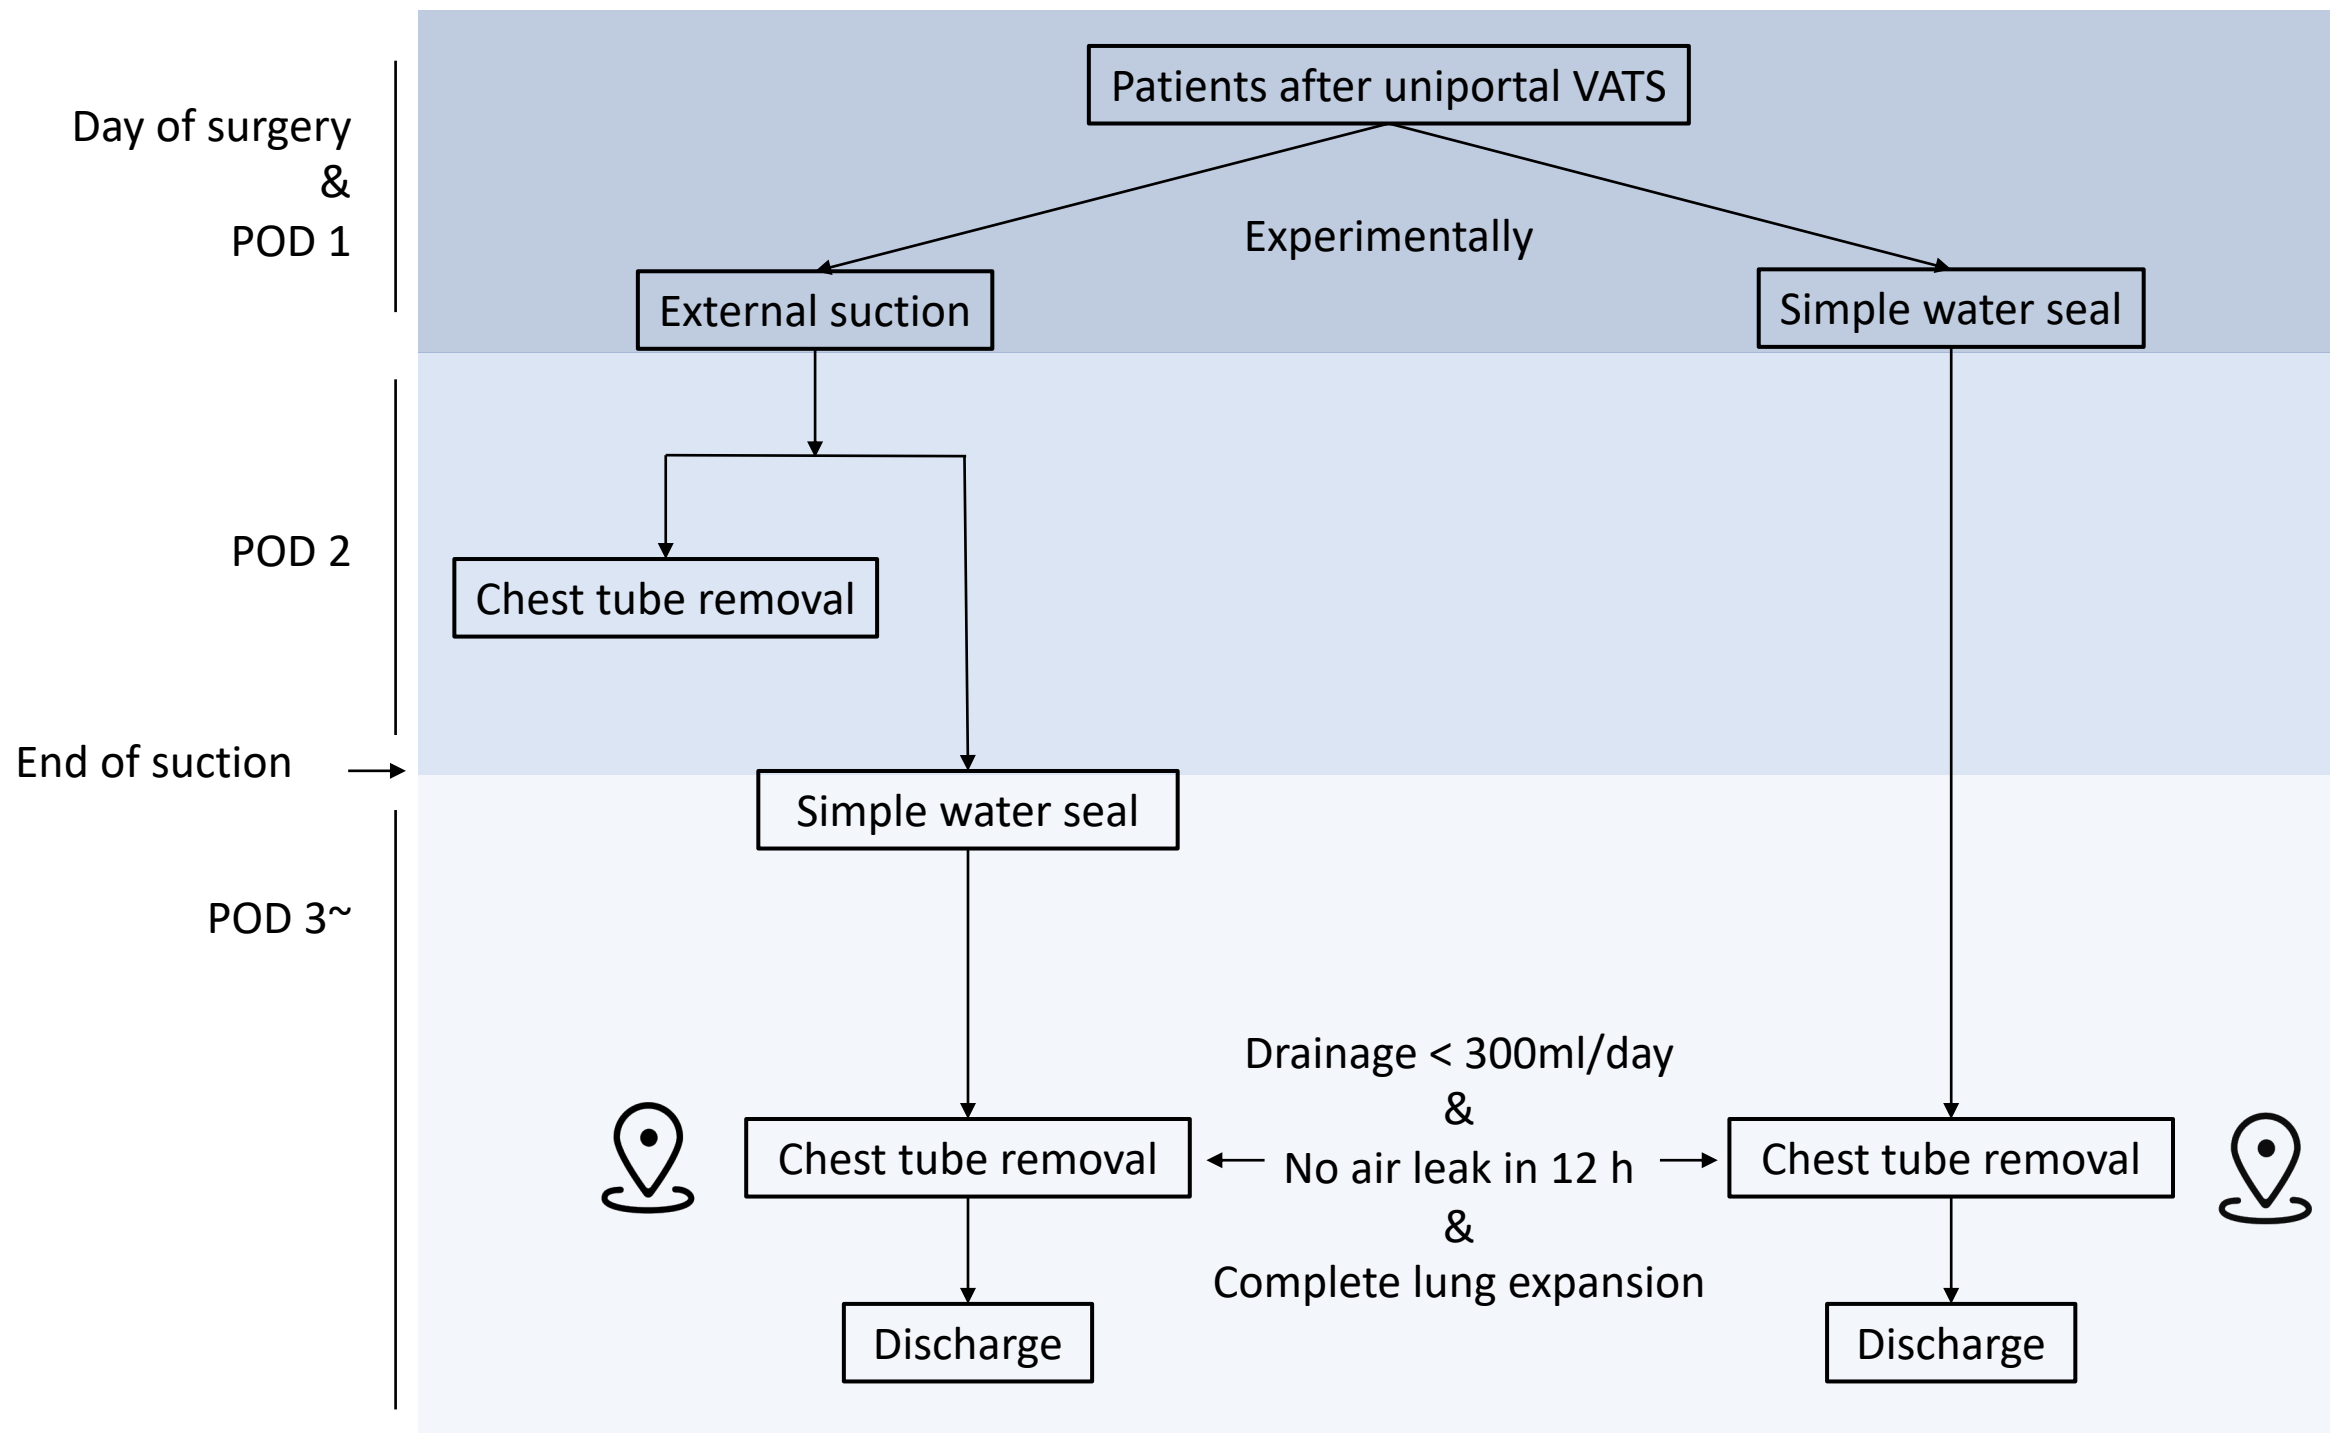

Supplement: DataSheet_1.pdf [file DataSheet_1.pdf]
